# Supplementary material for: All-atom molecular dynamics simulations of Synaptotagmin-SNARE-complexin complexes bridging a vesicle and a flat lipid bilayer
Source: eLife journal article supplement (doi:10.7554/elife.76356), 2022-06-16
Supplement: supp [file elife-76356-supp-v1.zip]

Archive with 11 entries (11 files):
- elife_poa_e76356_Figure_1_figure_supplement_1.pdf
- elife_poa_e76356_Figure_2_figure_supplement_1.pdf
- elife_poa_e76356_Figure_3_figure_supplement_1.pdf
- elife_poa_e76356_Figure_3_figure_supplement_2.pdf
- elife_poa_e76356_Figure_4_figure_supplement_1.pdf
- elife_poa_e76356_Figure_4_figure_supplement_2.pdf
- elife_poa_e76356_Figure_4_figure_supplement_3.pdf
- elife_poa_e76356_Figure_4_figure_supplement_4.pdf
- elife_poa_e76356_Figure_5_figure_supplement_1.pdf
- elife_poa_e76356_Figure_5_figure_supplement_2.pdf
- elife_poa_e76356_Transparent_Reporting_File.docx
