# Supplementary figures and images for: All-atom molecular dynamics simulations of Synaptotagmin-SNARE-complexin complexes bridging a vesicle and a flat lipid bilayer
Source: eLife journal article supplement (doi:10.7554/elife.76356), 2022-06-16

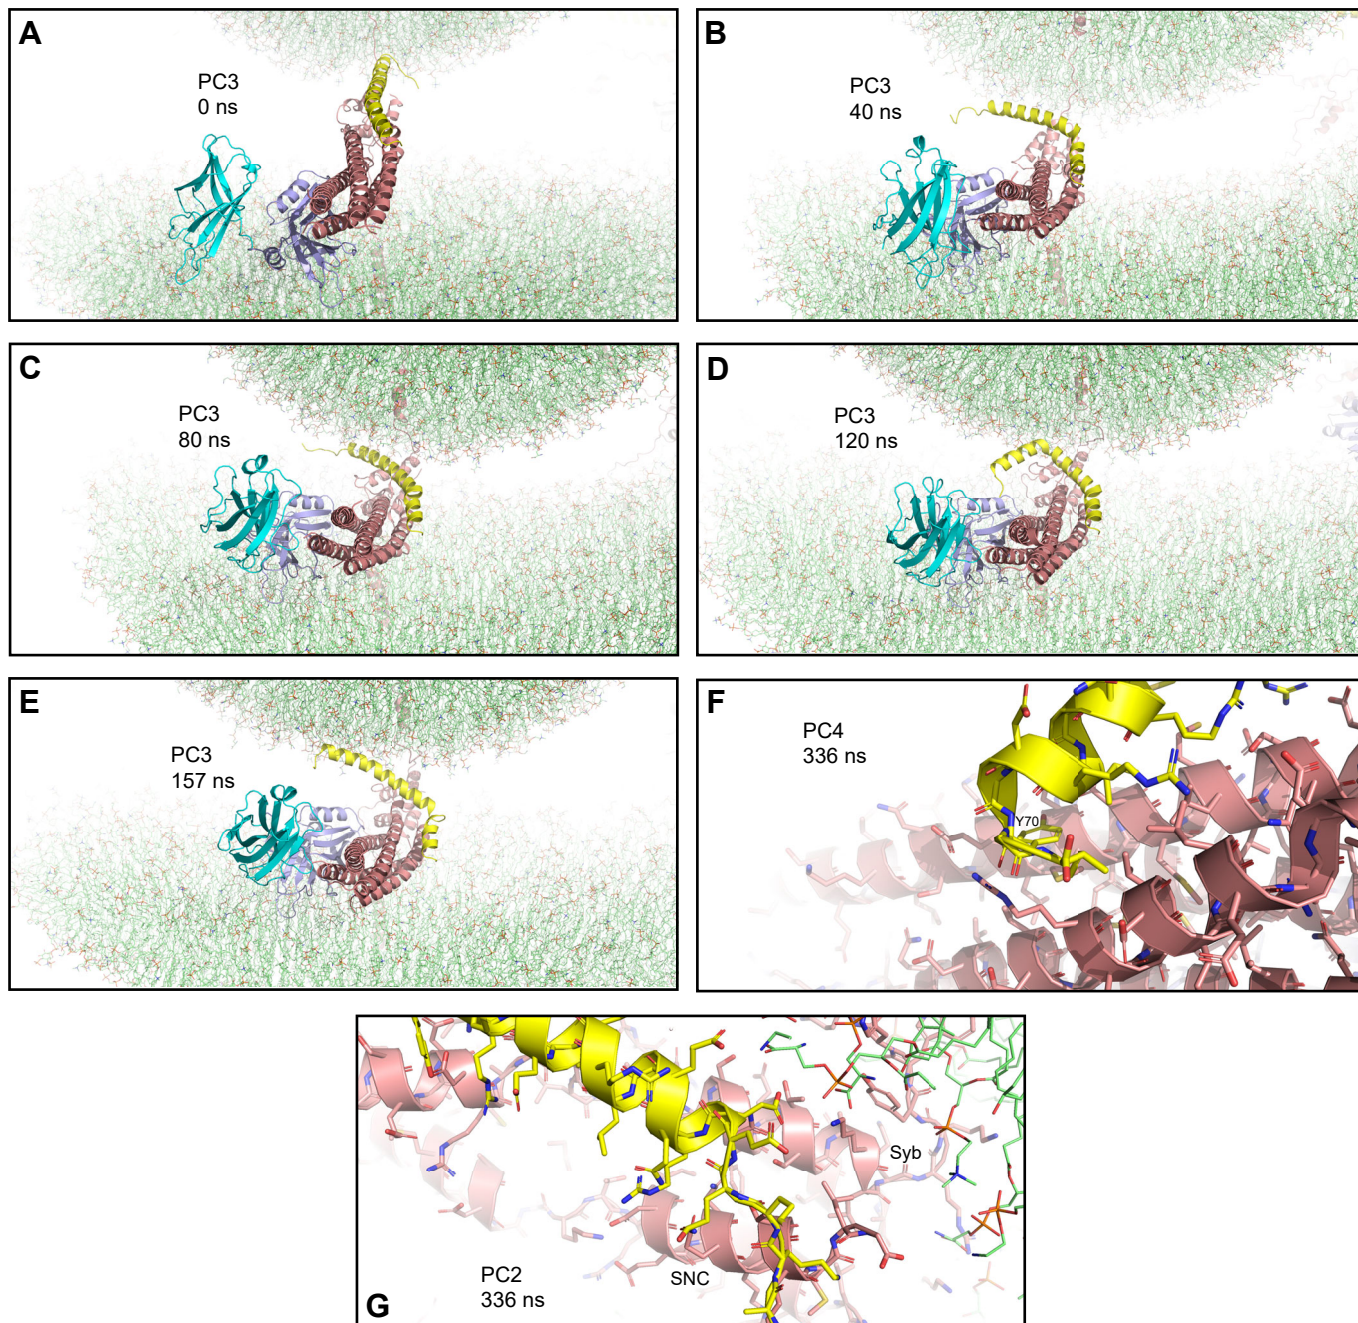

Figure 3 - figure supplement 2  
Rizo et al.

Supplement: supp [file elife-76356-supp-v1.zip]

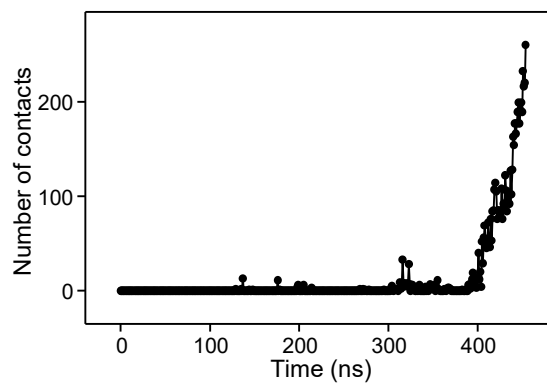

Figure 5— figure supplement 2  
Rizo et al.

Supplement: supp [file elife-76356-supp-v1.zip]

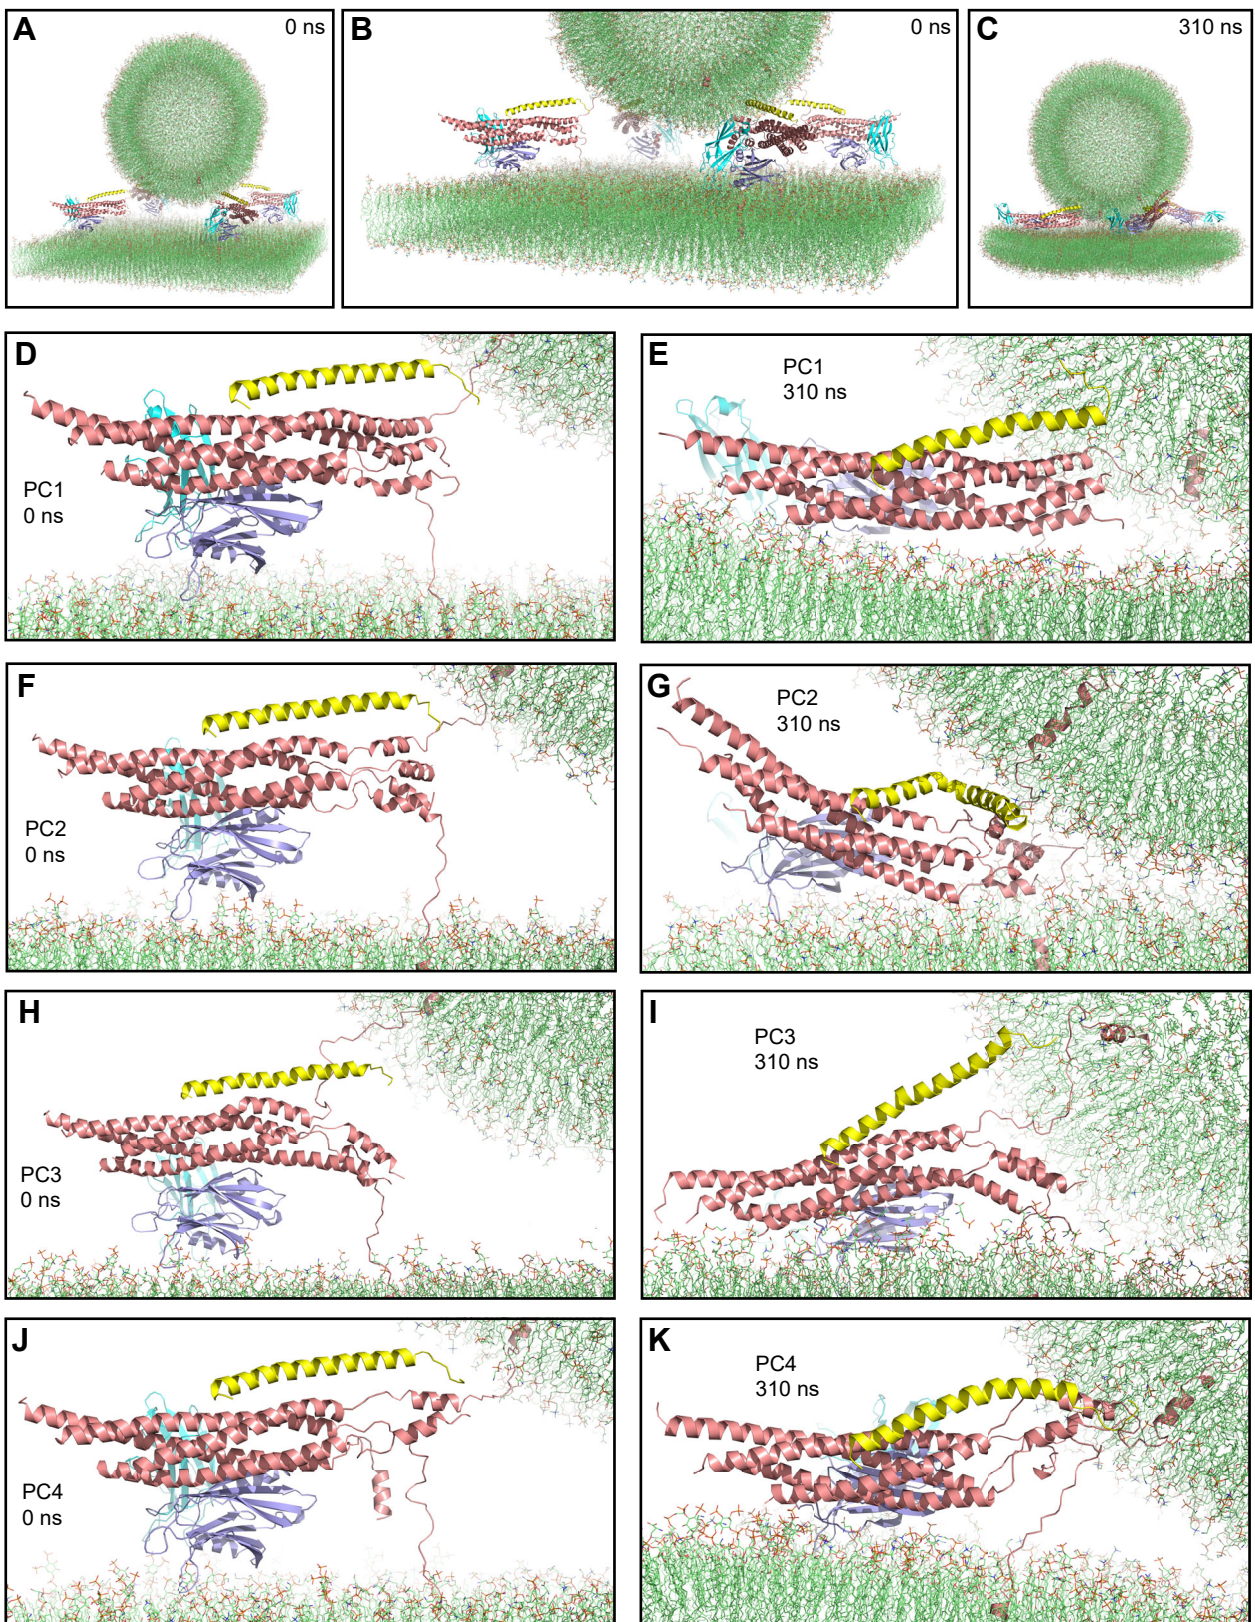

Figure 4 - figure supplement 2  
Rizo et al.

Supplement: supp [file elife-76356-supp-v1.zip]

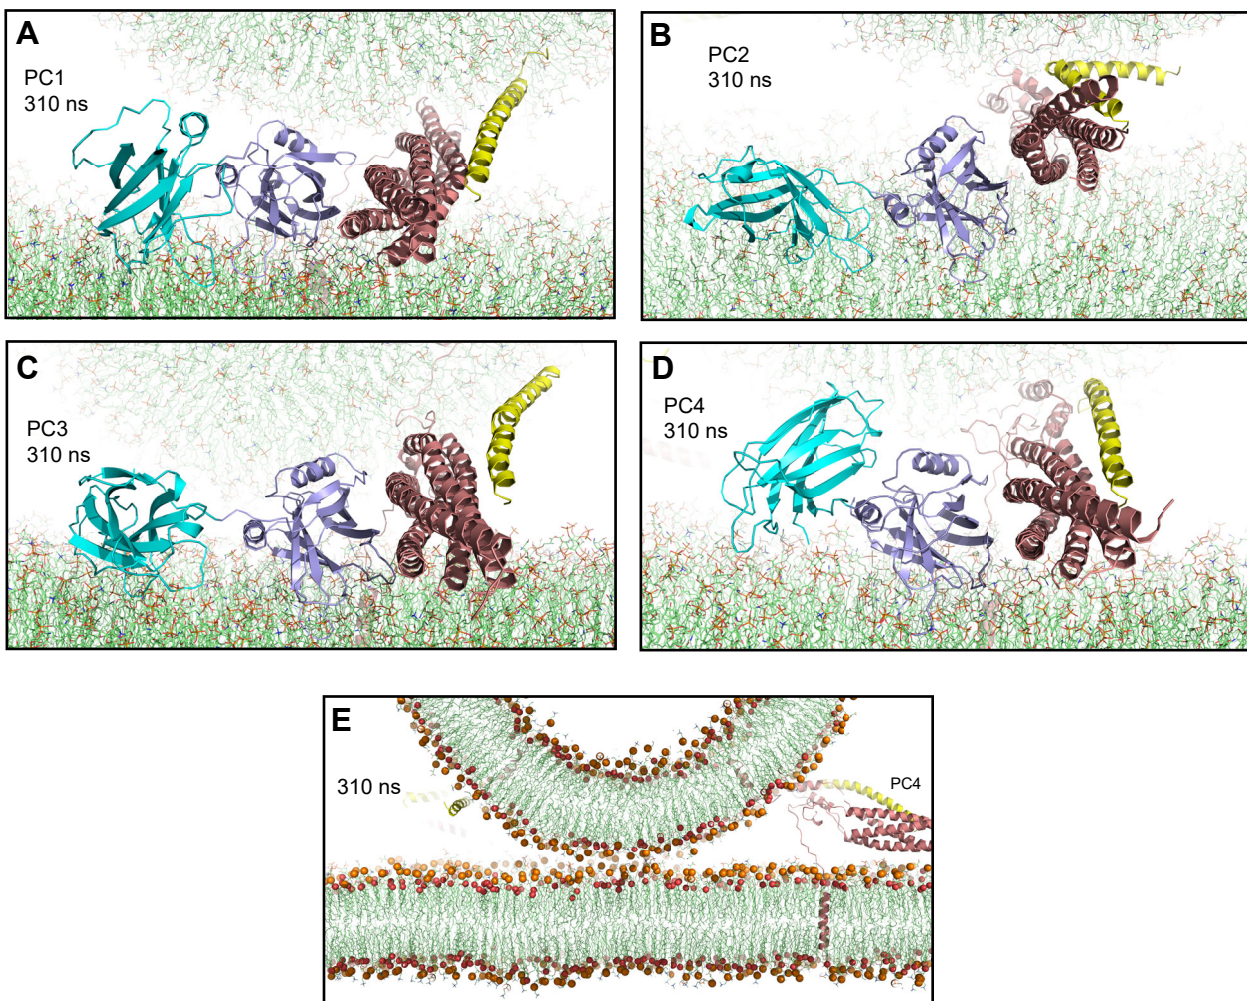

Figure 4 - figure supplement 3  
Rizo et al.

Supplement: supp [file elife-76356-supp-v1.zip]

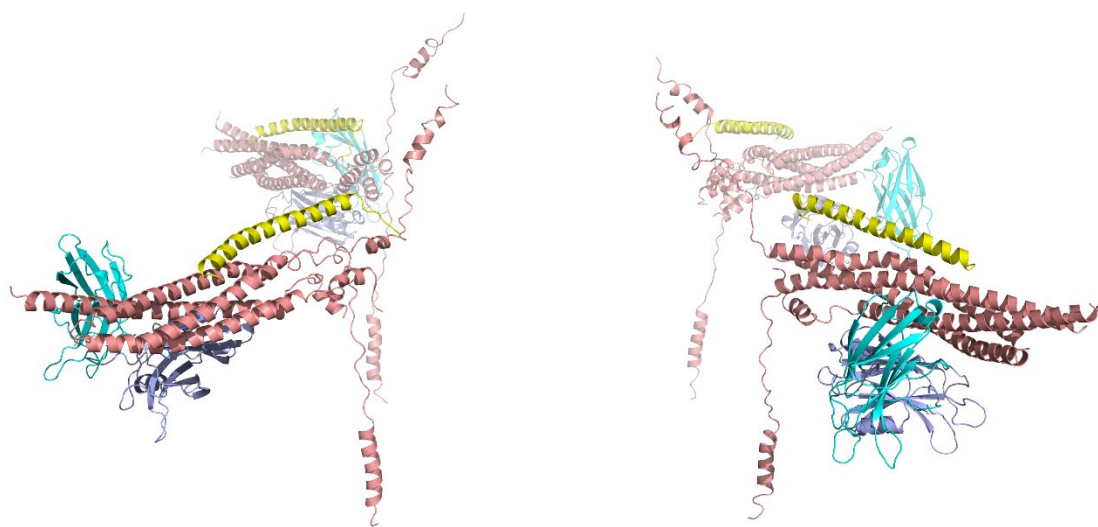

Figure 3 – figure supplement 1  
Rizo et al.

Supplement: supp [file elife-76356-supp-v1.zip]

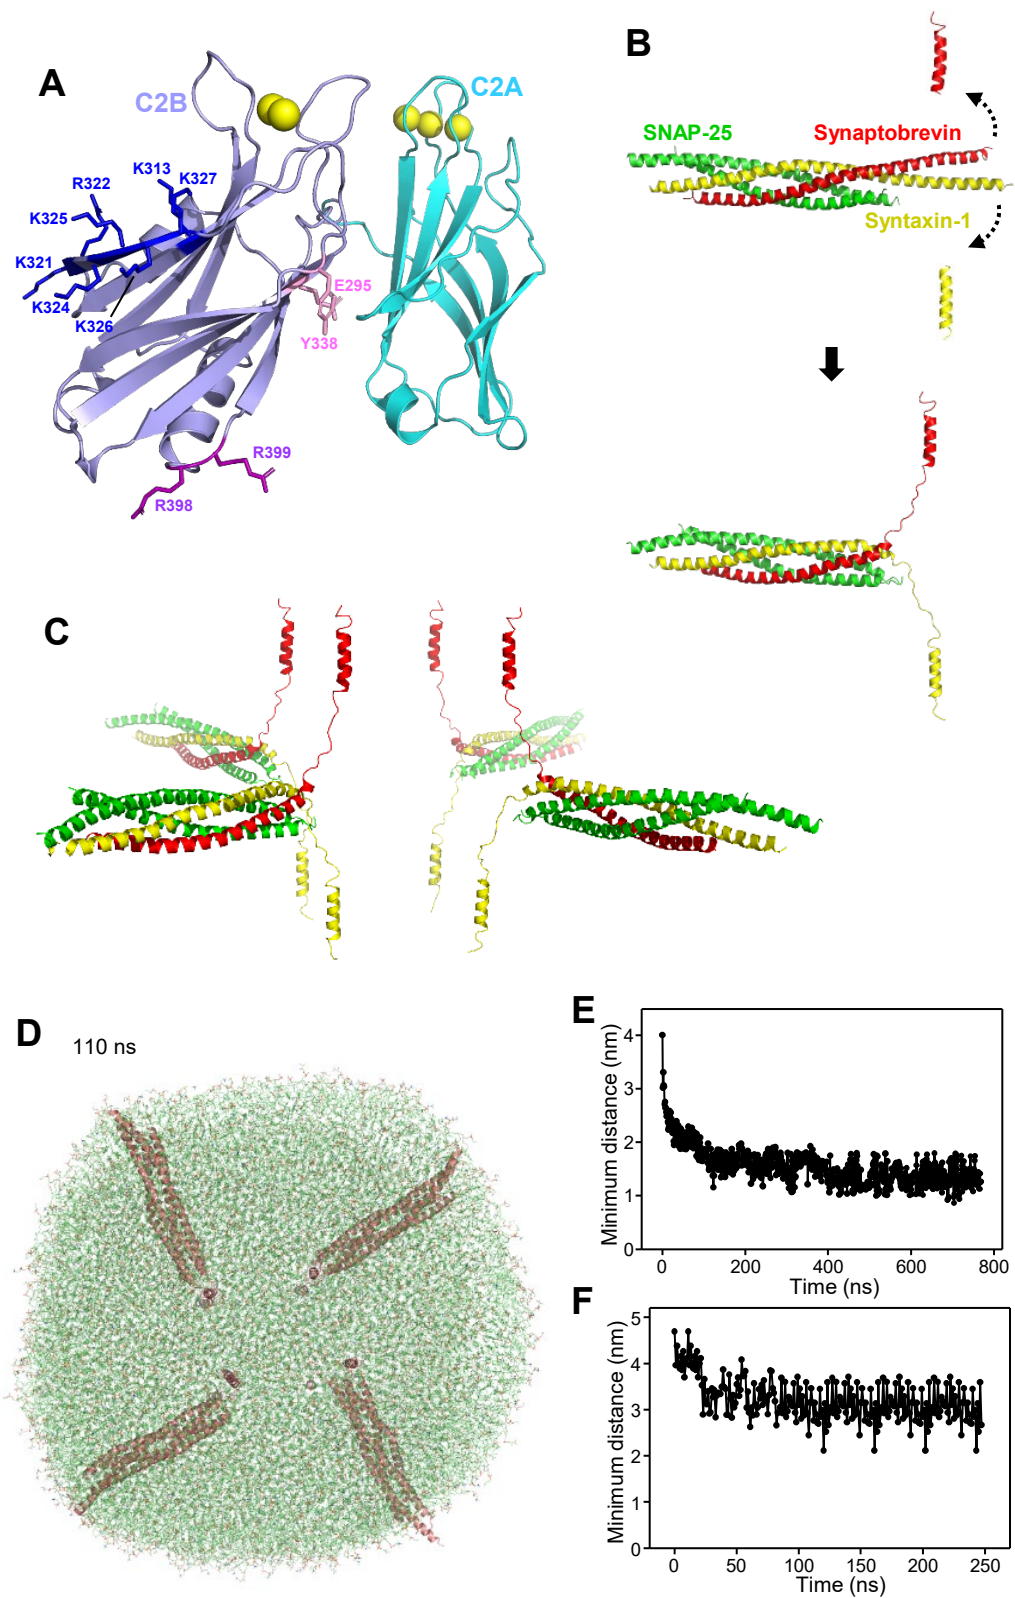

Supplement: supp [file elife-76356-supp-v1.zip]

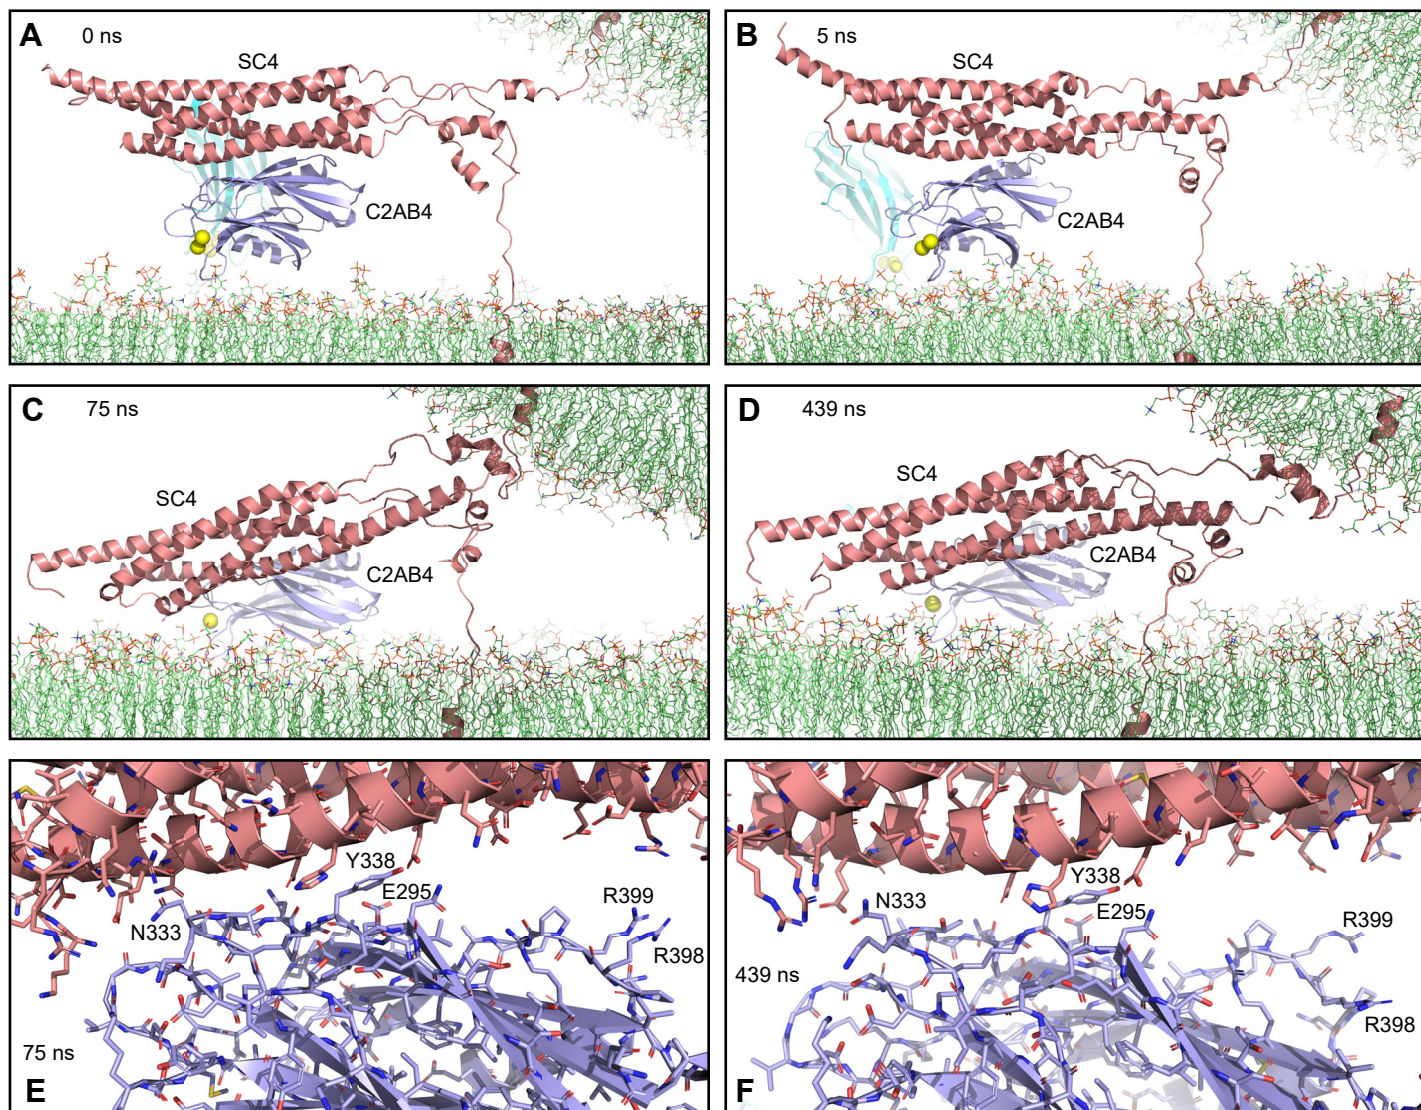

Figure 5 -figure supplement 1  
Rizo et al.

Supplement: supp [file elife-76356-supp-v1.zip]

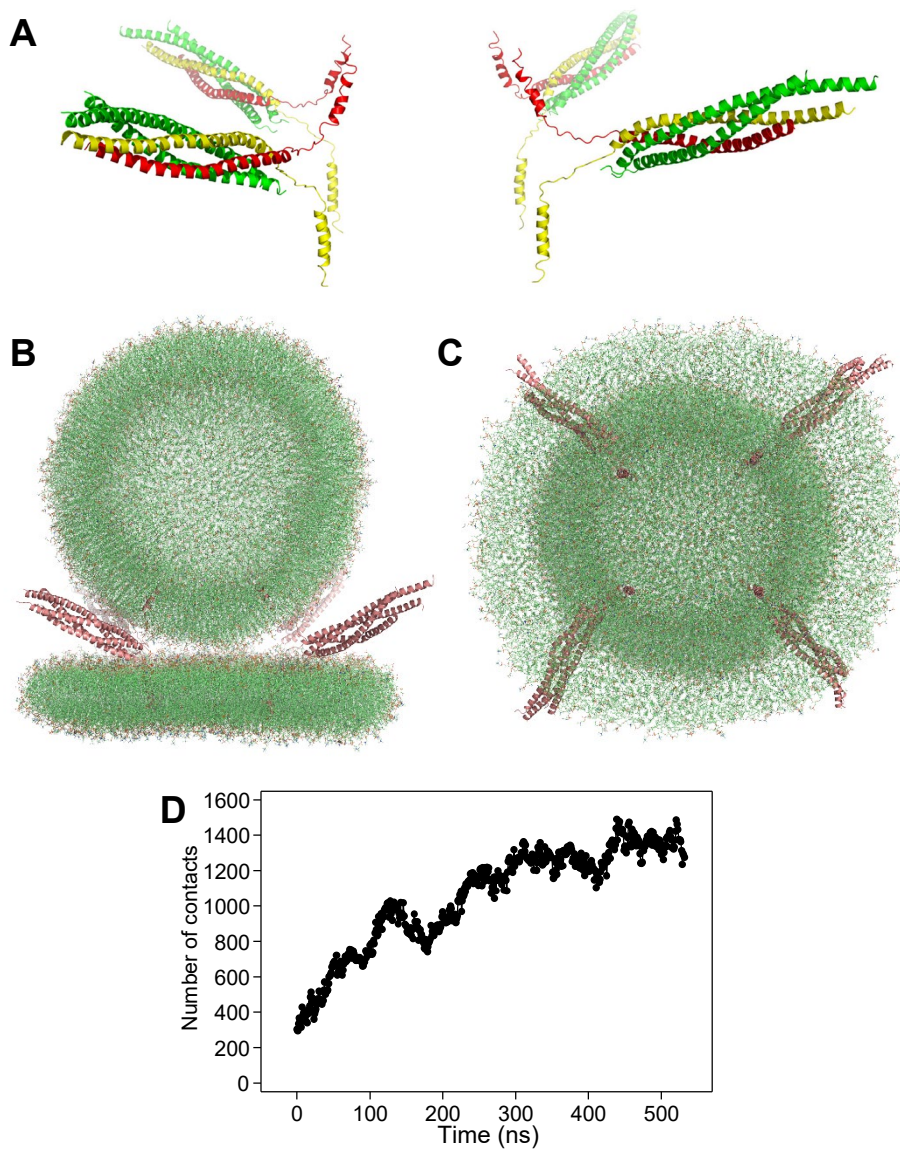

Figure 2 – figure supplement 1  
Rizo et al.

Supplement: supp [file elife-76356-supp-v1.zip › elife_poa_e76356_Figure_2_figure_supplement_1.pdf]

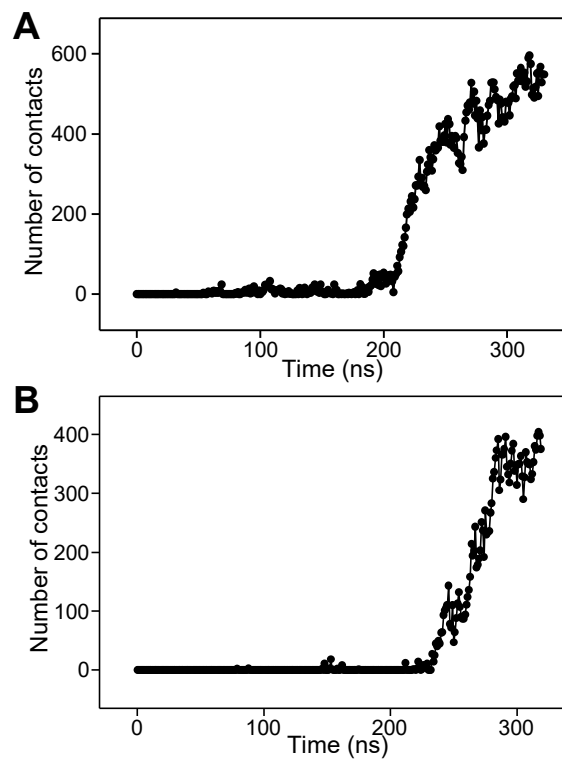

Figure 4 – figure supplement 4  
Rizo et al.

Supplement: supp [file elife-76356-supp-v1.zip › elife_poa_e76356_Figure_4_figure_supplement_4.pdf]
